# Supplementary material for: Synthesis and Characterization of New Cyclam-Based Zr(IV) Alkoxido Derivatives
Source: MDPI journal article supplement (doi:10.3390/reactions2030021), 2021-09-04
Supplement: s1 [file s1]

Archive with 3 entries (3 files):
- supplementary Figures.pdf
- Supplementary File S1.pdf
- Supplementary File S2.pdf
