# Supplementary material for: Synthesis and Characterization of New Cyclam-Based Zr(IV) Alkoxido Derivatives
Source: MDPI journal article supplement (doi:10.3390/reactions2030021), 2021-09-04
Supplement: s1 [file s1 › supplementary Figures.pdf]

Article

# Synthesis and Characterization of New Cyclam-Based Zr(IV) Alkoxido Derivatives

Luis G. Alves <sup>1,\*</sup> and Ana M. Martins <sup>2</sup>

<sup>1</sup> Centro de Química Estrutural, Associação do Instituto Superior Técnico Para a Investigação de Desenvolvimento, 1049-003 Lisboa, Portugal

<sup>2</sup> Centro de Química Estrutural, Instituto Superior Técnico, Universidade de Lisboa, 1049-001 Lisboa, Portugal; ana.martins@tecnico.ulisboa.pt

\* Correspondence: luis.g.alves@tecnico.ulisboa.pt

## Supplementary Information

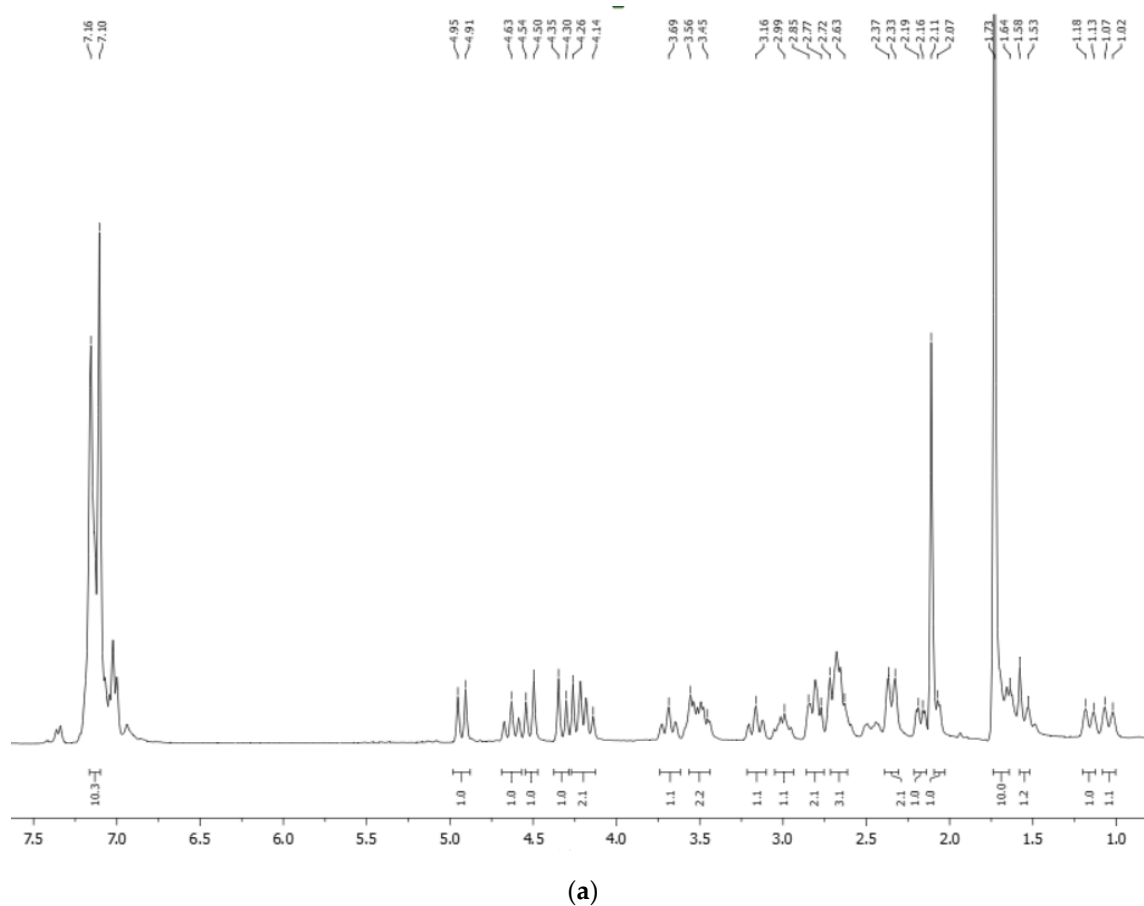

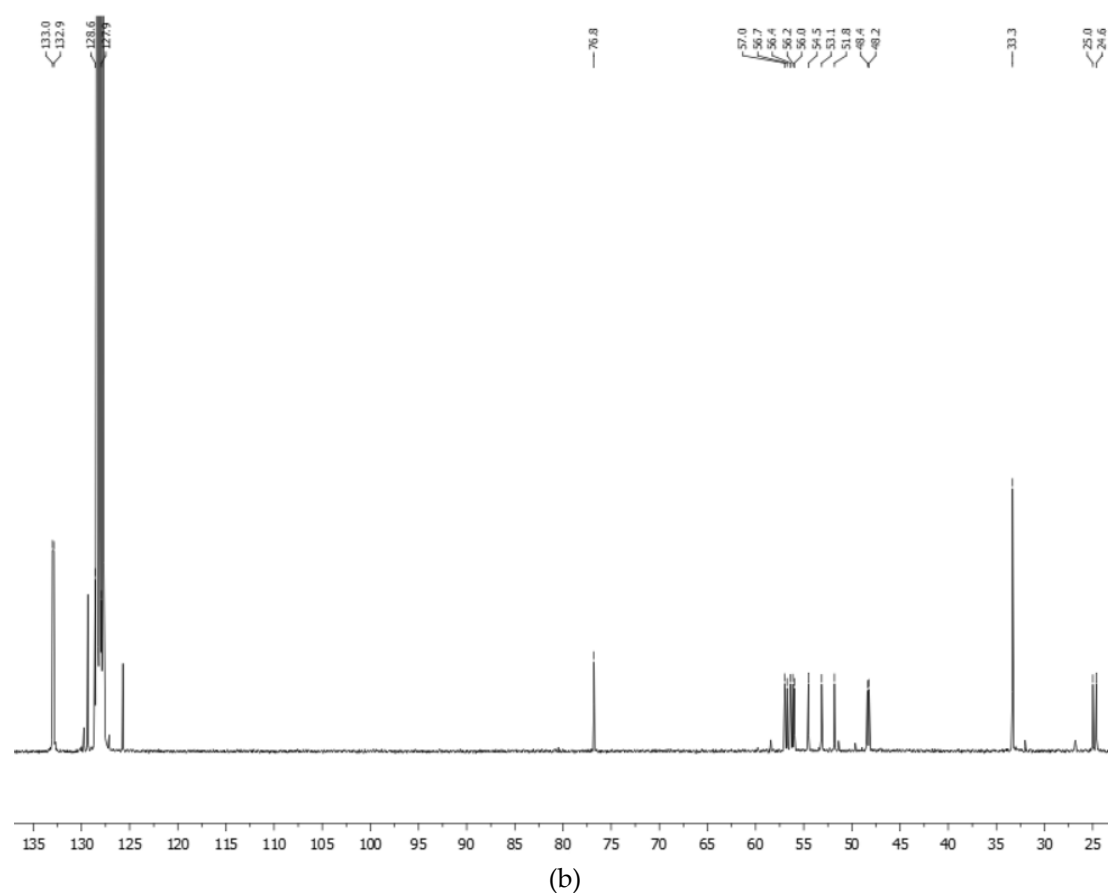

**Figure S1.** (a) <sup>1</sup>H NMR spectrum of compound 2 in C<sub>6</sub>D<sub>6</sub> at 296K; (b) <sup>13</sup>C{<sup>1</sup>H} NMR spectrum of compound 2 in C<sub>6</sub>D<sub>6</sub> at 296K.

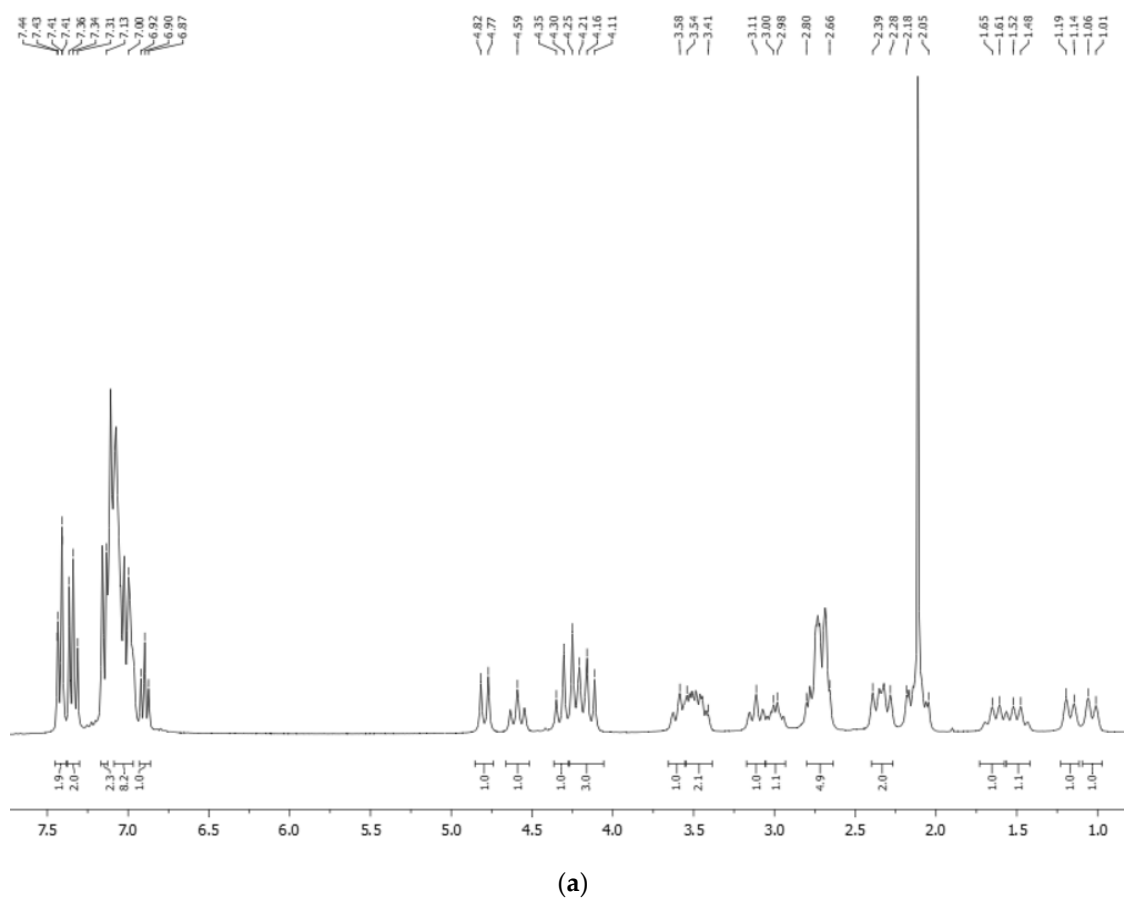

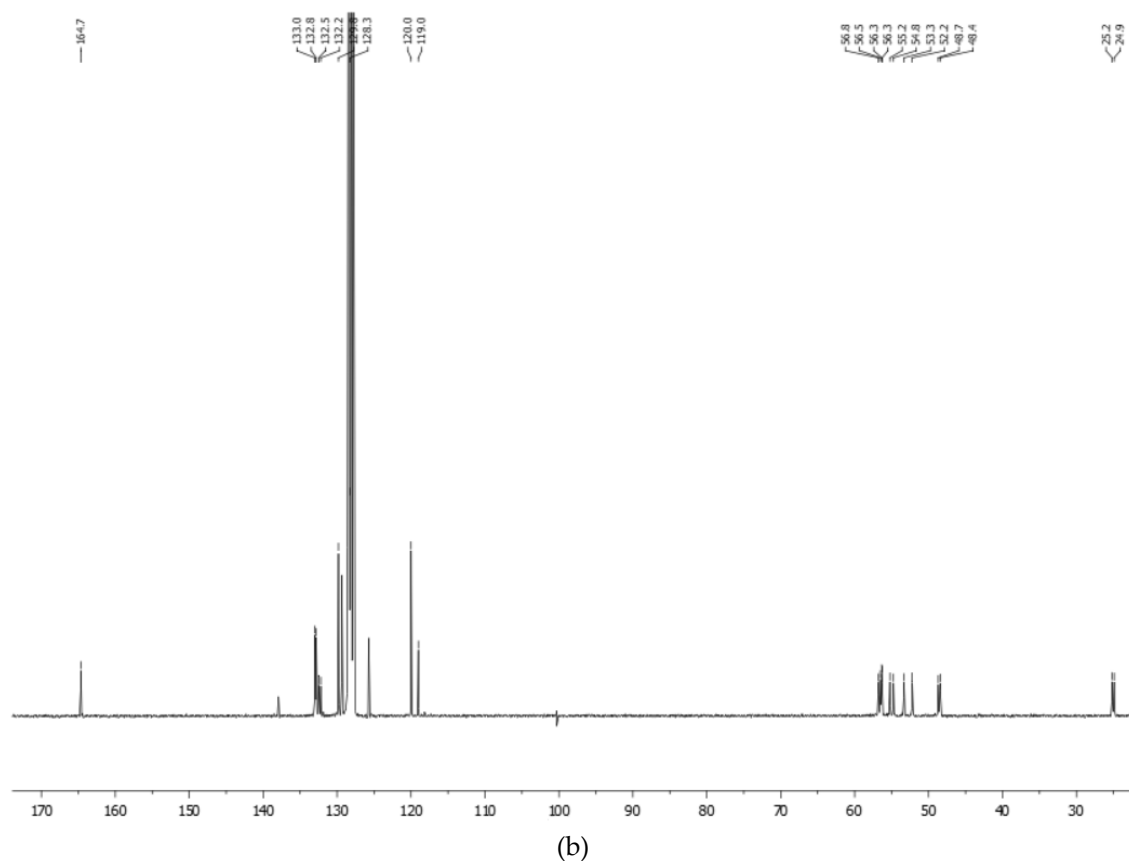

Figure S2. (a) <sup>1</sup>H NMR spectrum of compound 4 in C<sub>6</sub>D<sub>6</sub> at 296K; (b) <sup>13</sup>C{<sup>1</sup>H} NMR spectrum of compound 4 in C<sub>6</sub>D<sub>6</sub> at 296K.

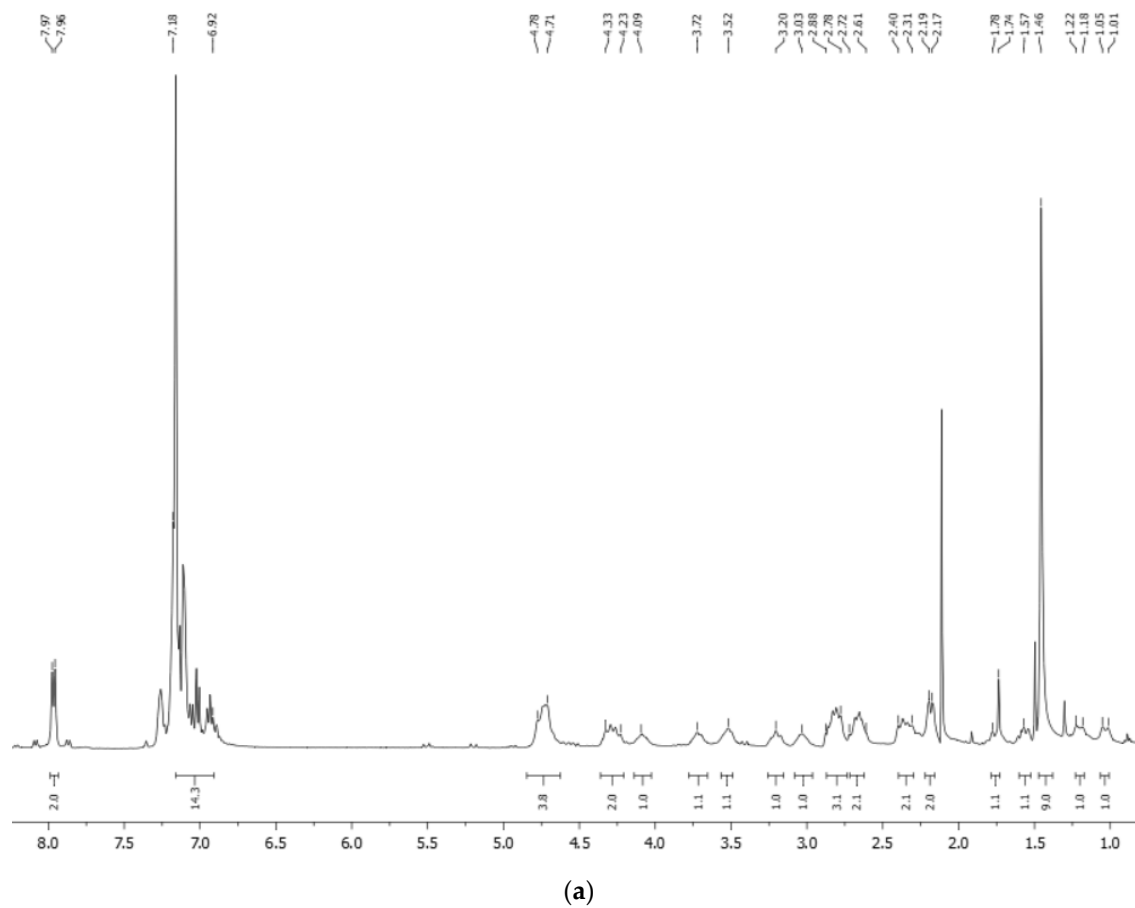

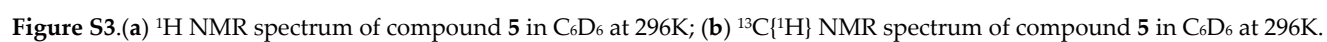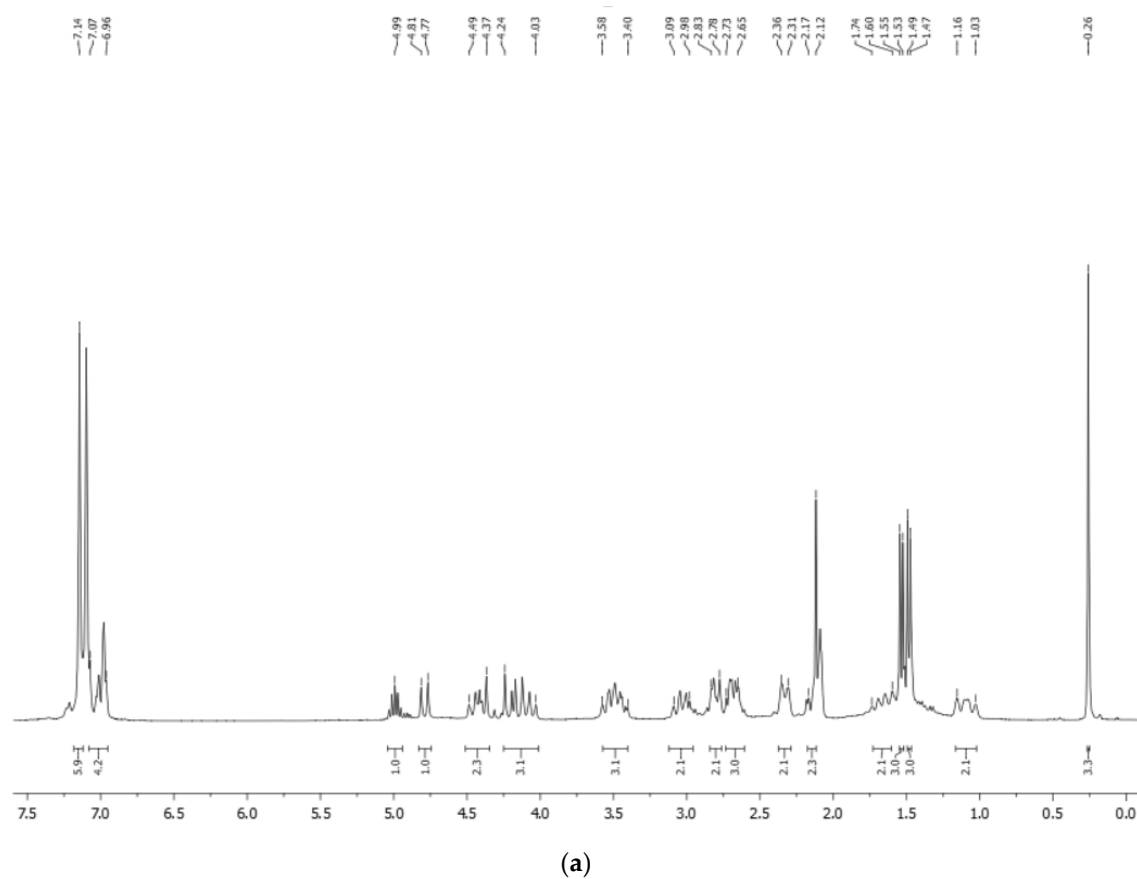

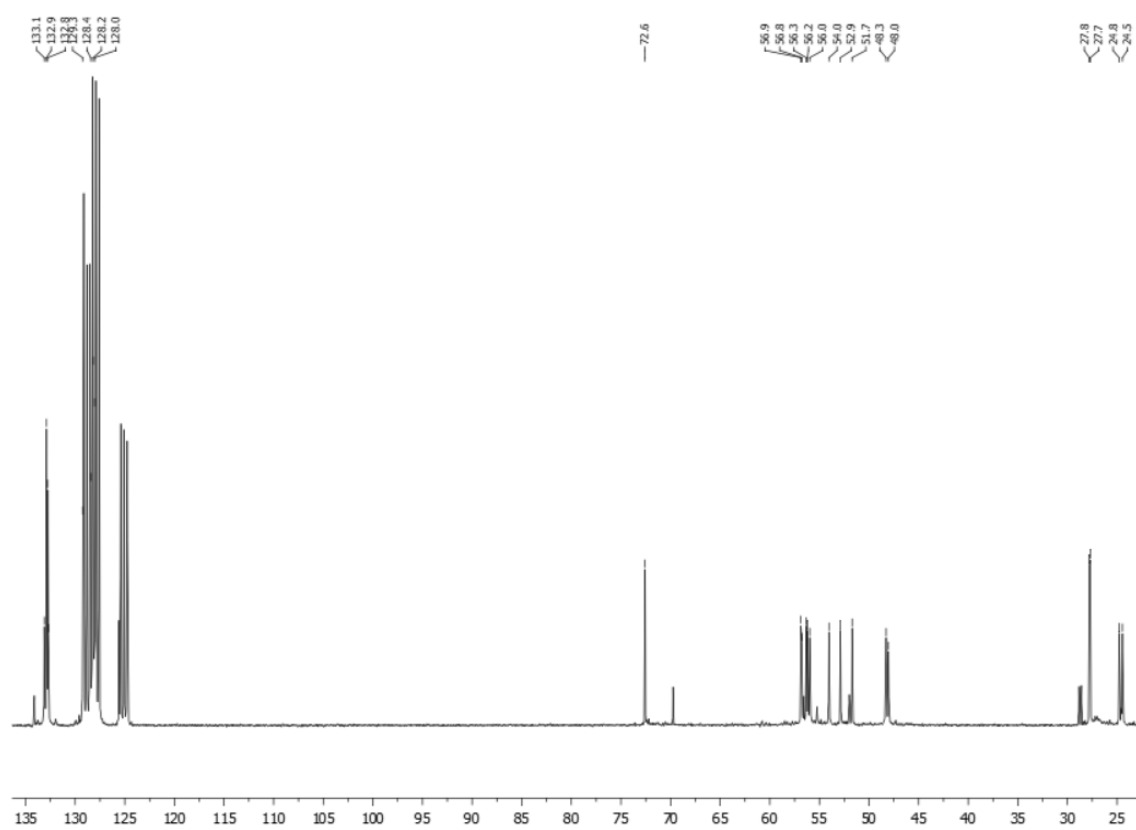

(b)

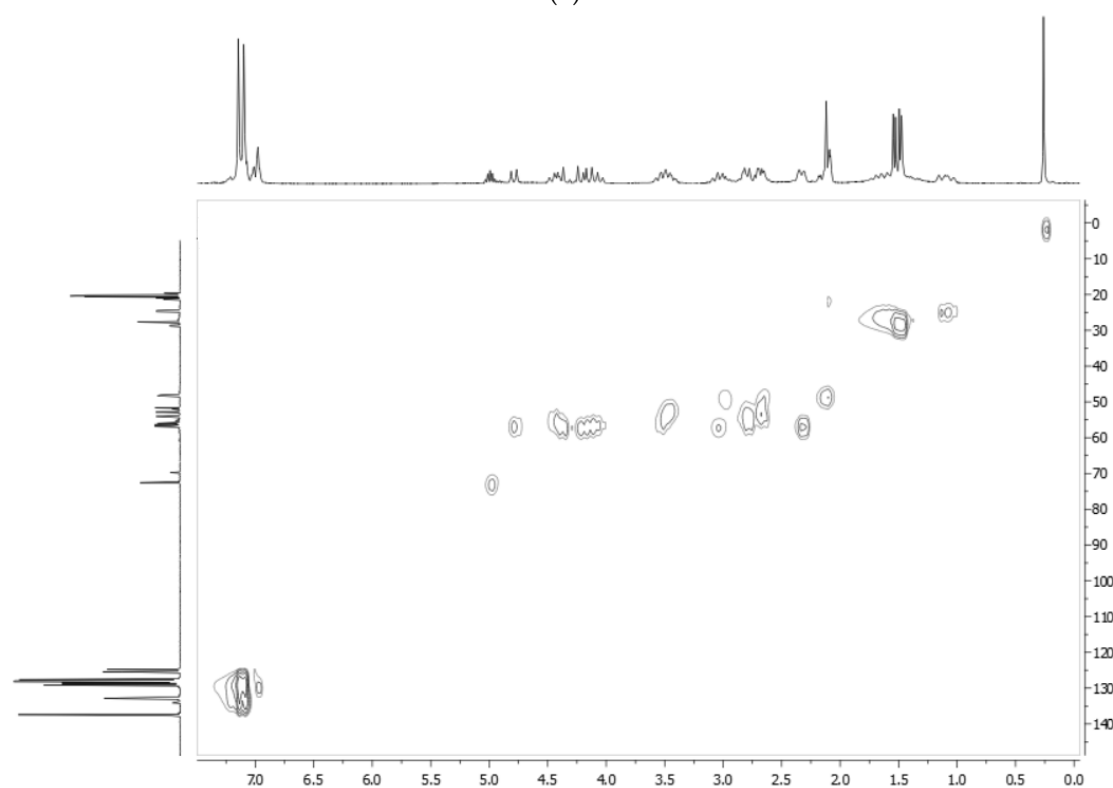

(c)

**Figure S4.** (a)  $^1\text{H}$  NMR spectrum of compound 6 in  $\text{Tol-d}_8$  at 296K; (b)  $^{13}\text{C}\{^1\text{H}\}$  NMR spectrum of compound 6 in  $\text{Tol-d}_8$  at 296K; (c)  $^{13}\text{C}\{^1\text{H}\}$  HSQC spectrum of compound 6 in  $\text{Tol-d}_8$  at 296K.

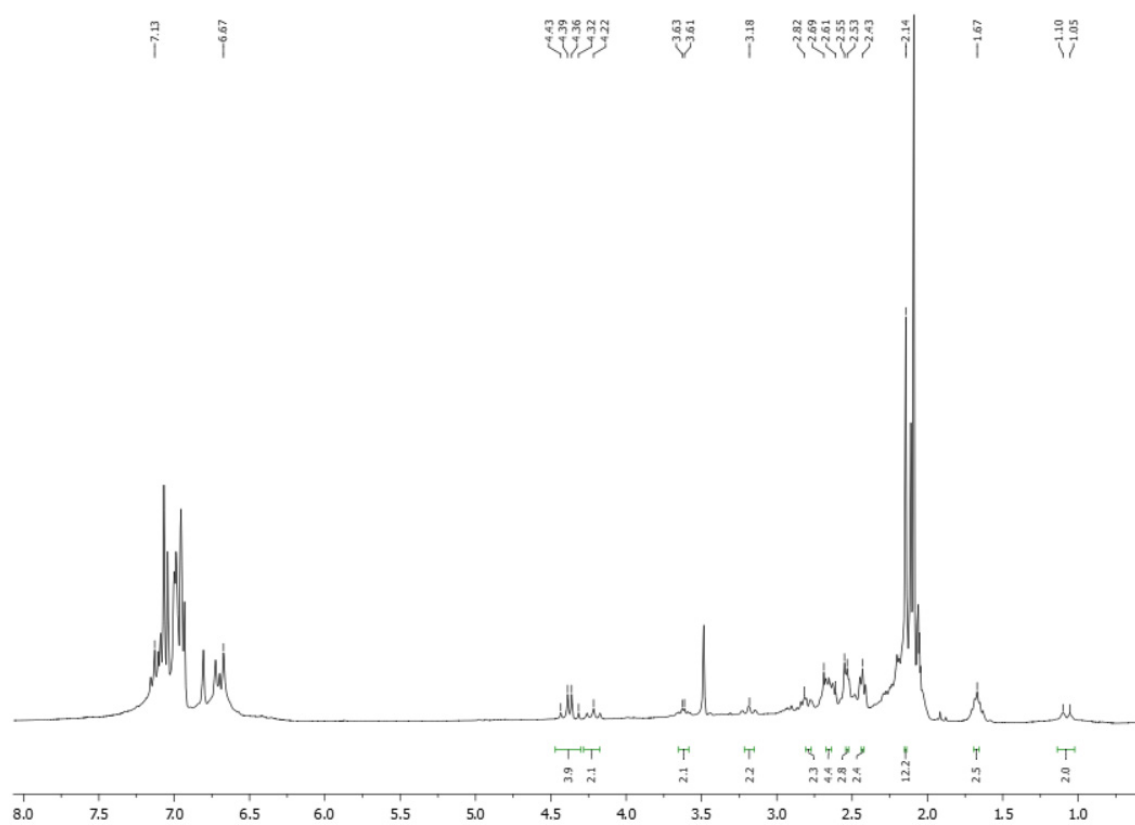

(a)

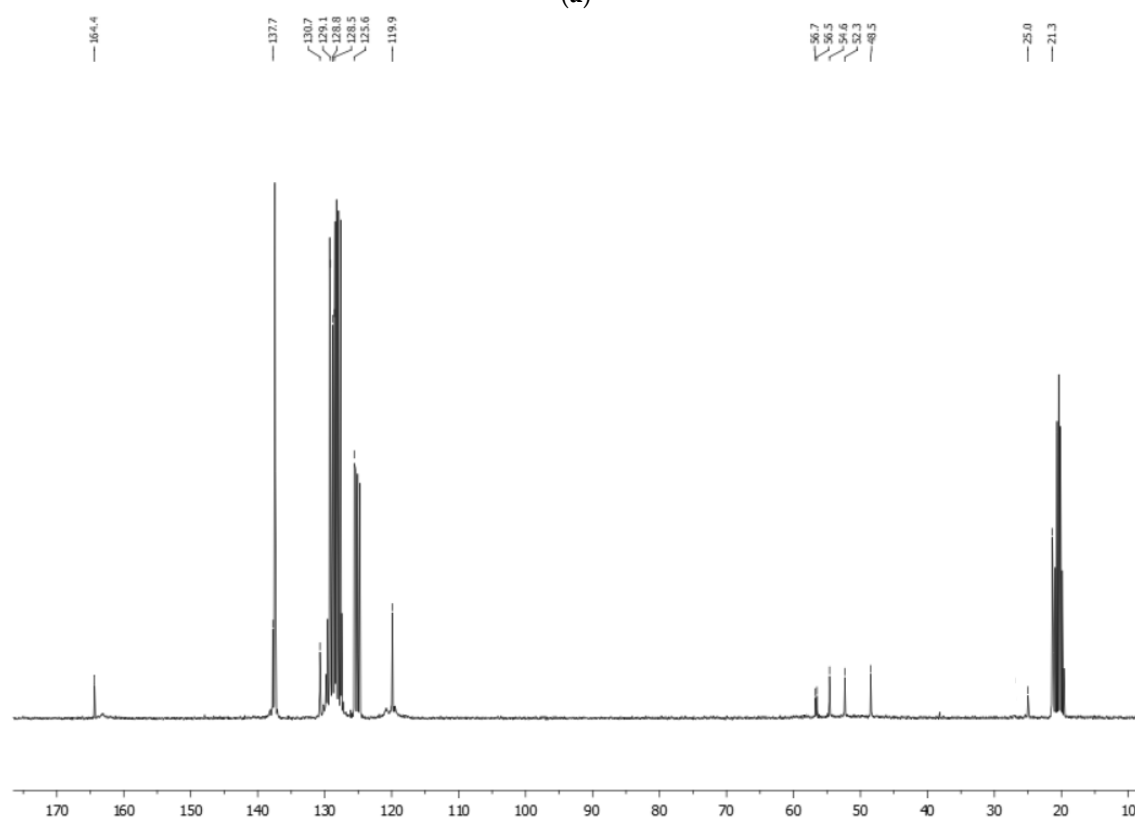

(b)

**Figure S5.**(a) <sup>1</sup>H NMR spectrum of compound 10 in Tol-d<sub>8</sub> at 296K; (b) <sup>13</sup>C{<sup>1</sup>H} NMR spectrum of compound 10 in Tol-d<sub>8</sub> at 296K.

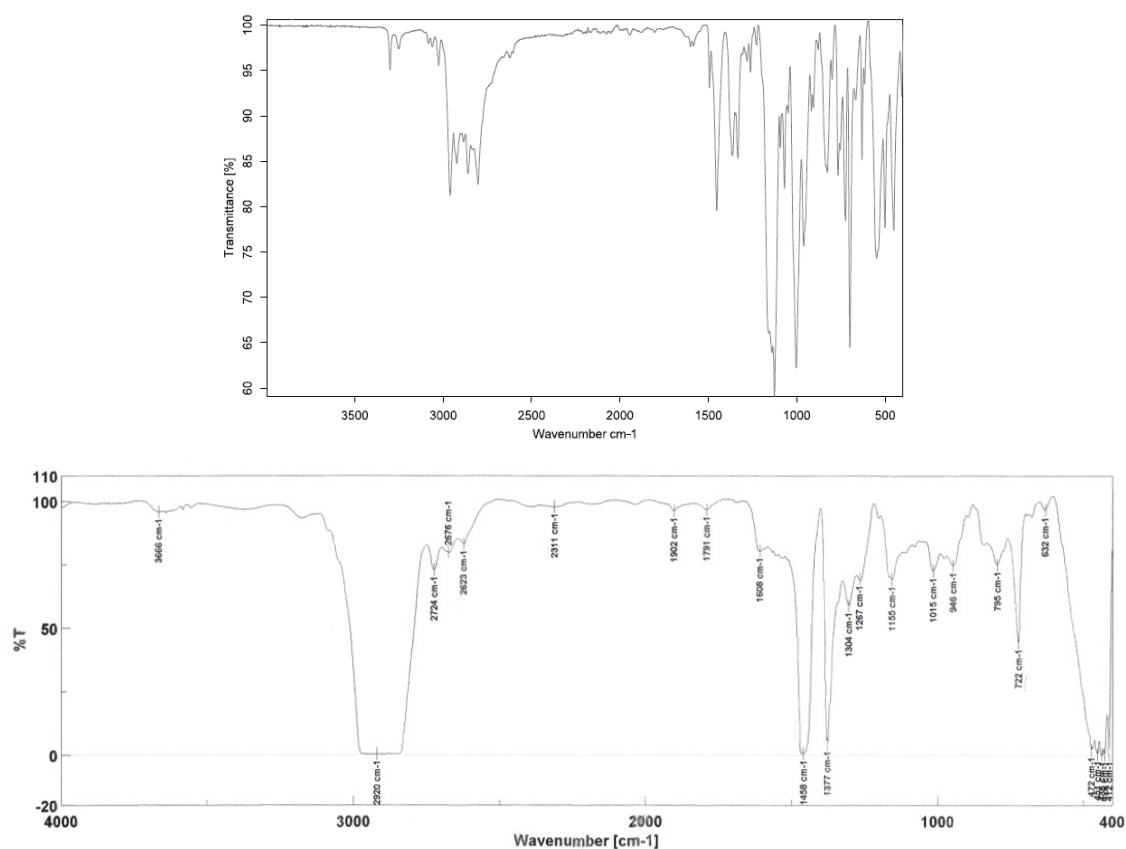

Figure S6. FT-IR spectra of 11 (top) and 13 (bottom).

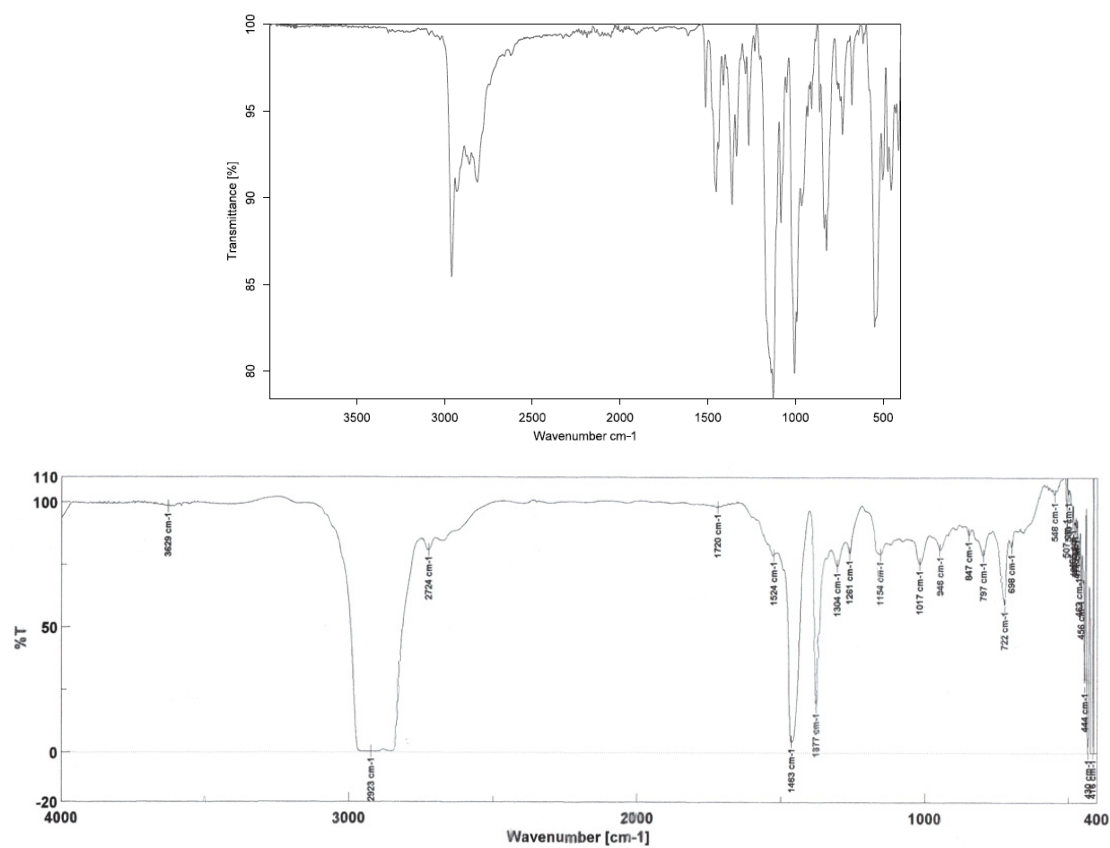

Figure S7. FT-IR spectra of 12 (top) and 14 (bottom).
